# Supplementary material
Source: PubMed Central journal article supplement (PMC6477981)
Supplement: bty810_supplementary_data.pdf [file bty810_supplementary_data.pdf]

## *Supplementary Information*

# **A Clustering Linear Combination Approach to Jointly Analyze Multiple Phenotypes for GWAS**

Qiuying Sha, Zhenchuan Wang, Xiao Zhang, Shuanglin Zhang\*

Department of Mathematical Sciences, Michigan Technological University, Houghton, Michigan

\*To whom correspondence should be addressed.

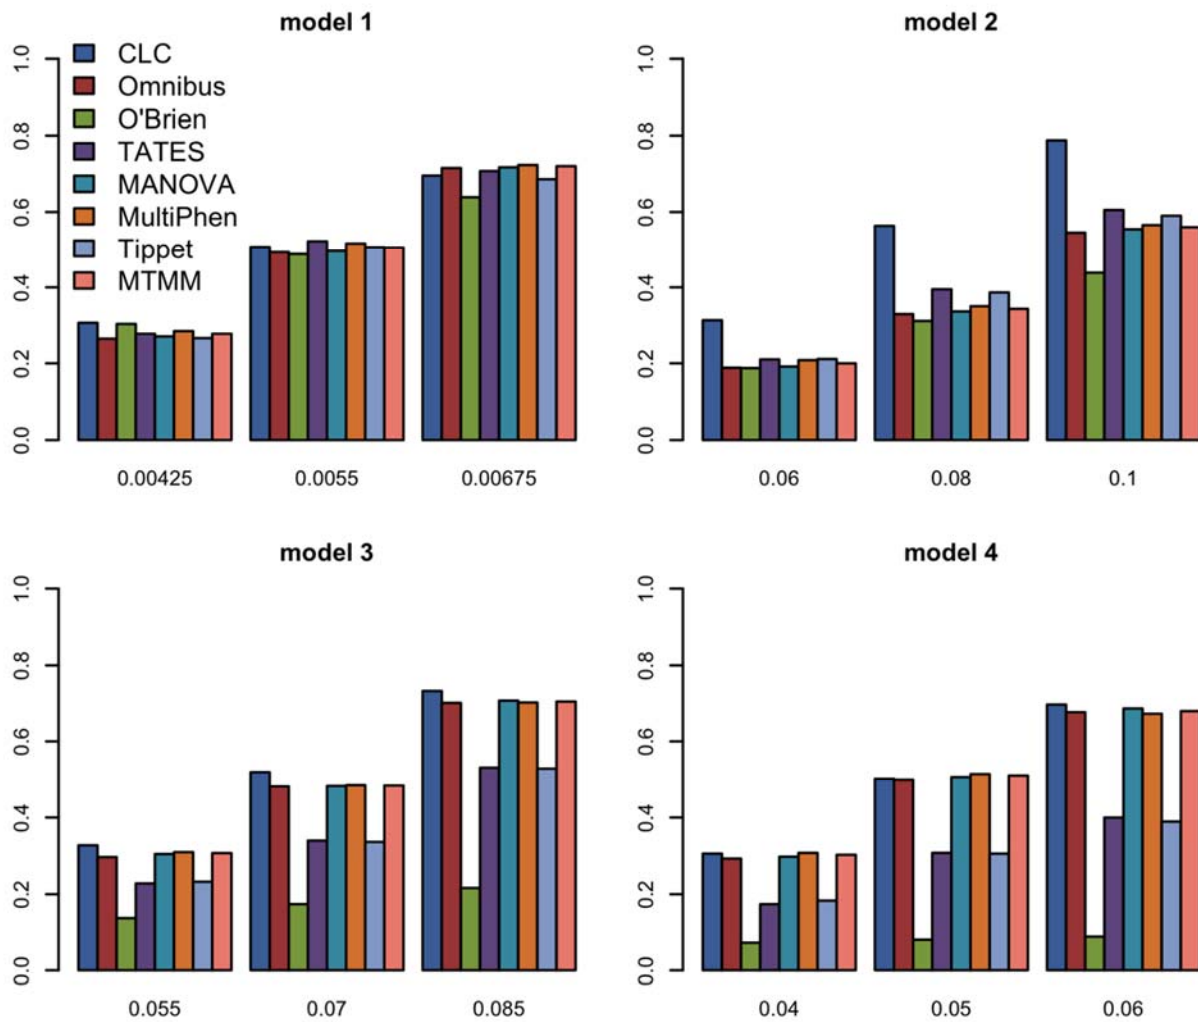

**Fig. S1.** Power comparisons of the eight tests (O'Brien, Omnibus, CLC, TATES, MANOVA, MultiPhen, Tippet, and MTMM) for the power as a function of effect size  $\beta$  for 20 phenotypes with half quantitative phenotypes and half qualitative phenotypes. The sample size is 1000. The between-factor correlation is 0.15 and the within-factor correlation is 0.25.

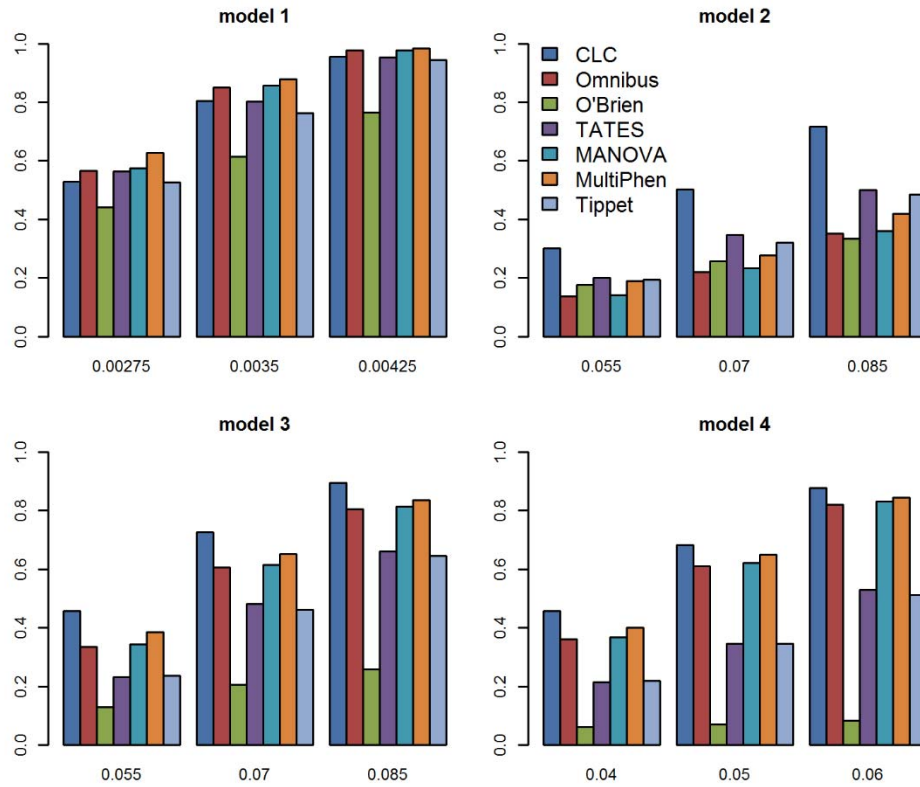

**Fig. S2.** Power comparisons of the seven tests (O'Brien, Omnibus, CLC, TATES, MANOVA, MultiPhen, and Tippet) for the power as a function of effect size  $\beta$  for 40 phenotypes with half quantitative phenotypes and half qualitative phenotypes. The sample size is 1000. The between-factor correlation is 0.15 and the within-factor correlation is 0.25.

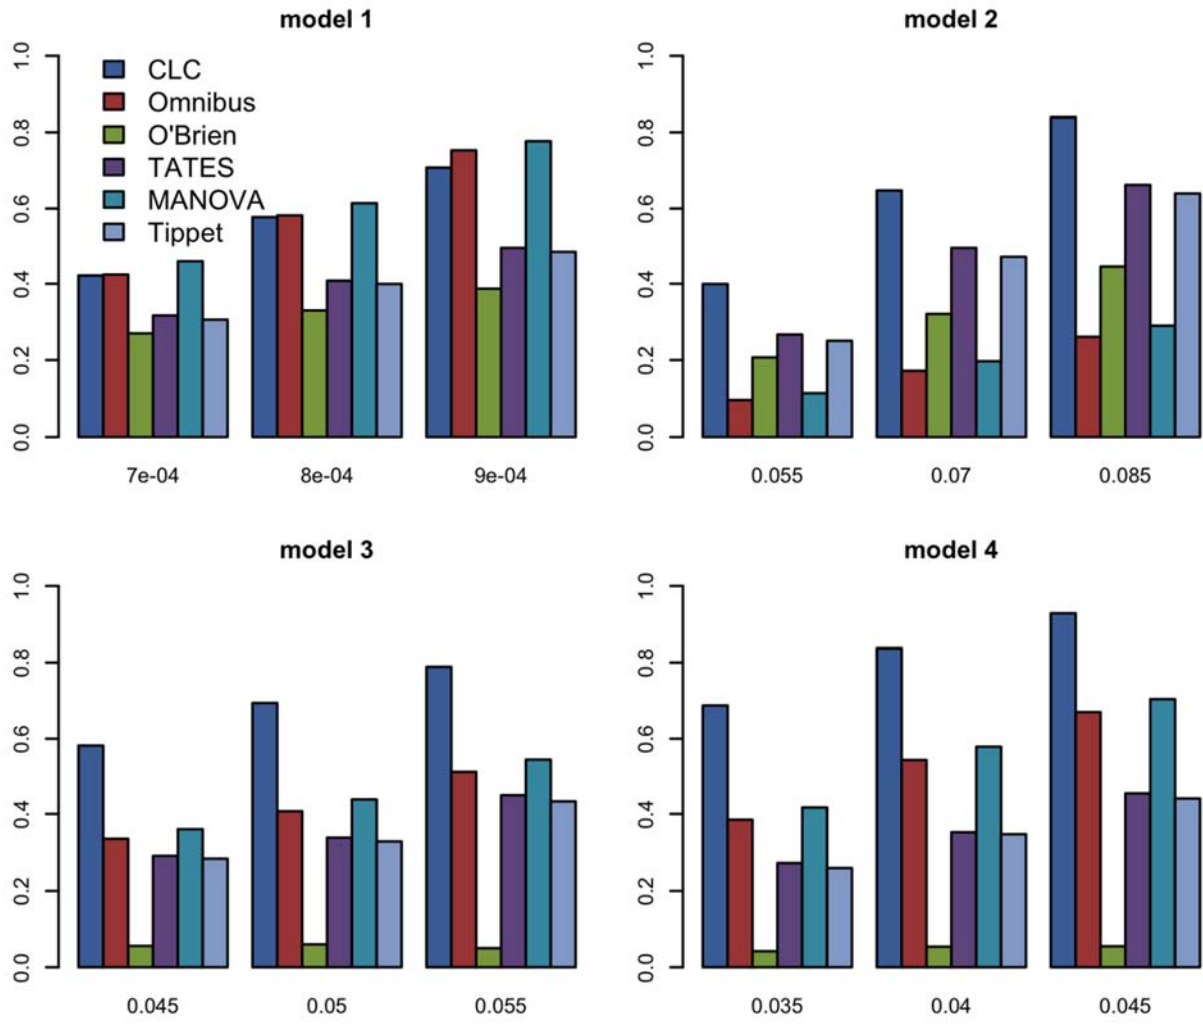

**Fig. S3.** Power comparisons of the six tests (O'Brien, Omnibus, CLC, TATES, MANOVA, and Tippet) for the power as a function of effect size  $\beta$  for 100 quantitative phenotypes. The sample size is 1000. The between-factor correlation is 0.15 and the within-factor correlation is 0.25.

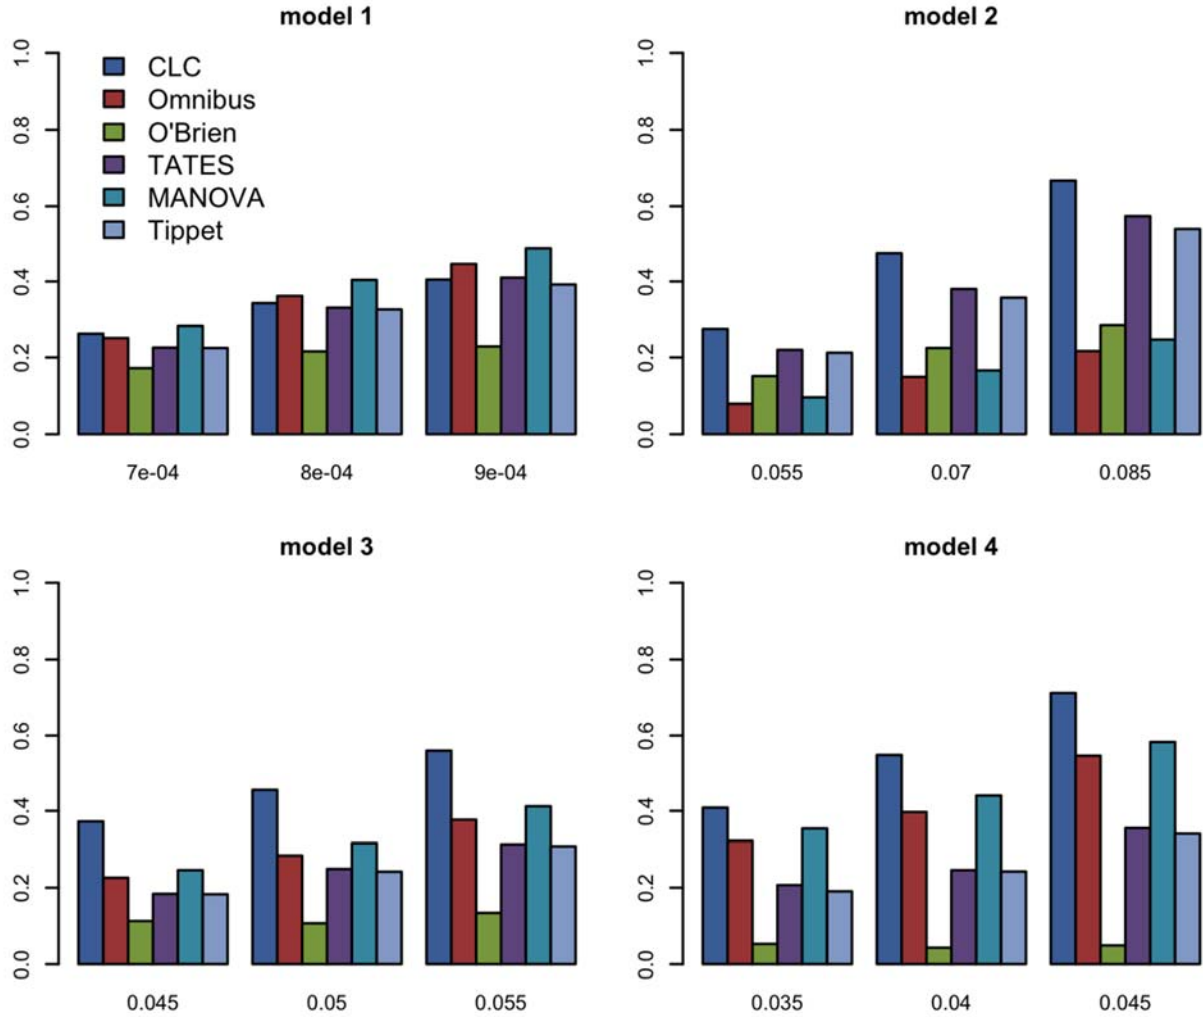

**Fig. S4.** Power comparisons of the six tests (O'Brien, Omnibus, CLC, TATES, MANOVA, and Tippet) for the power as a function of effect size  $\beta$  for 100 phenotypes with half quantitative phenotypes and half qualitative phenotypes. The sample size is 1000. The between-factor correlation is 0.15 and the within-factor correlation is 0.25.

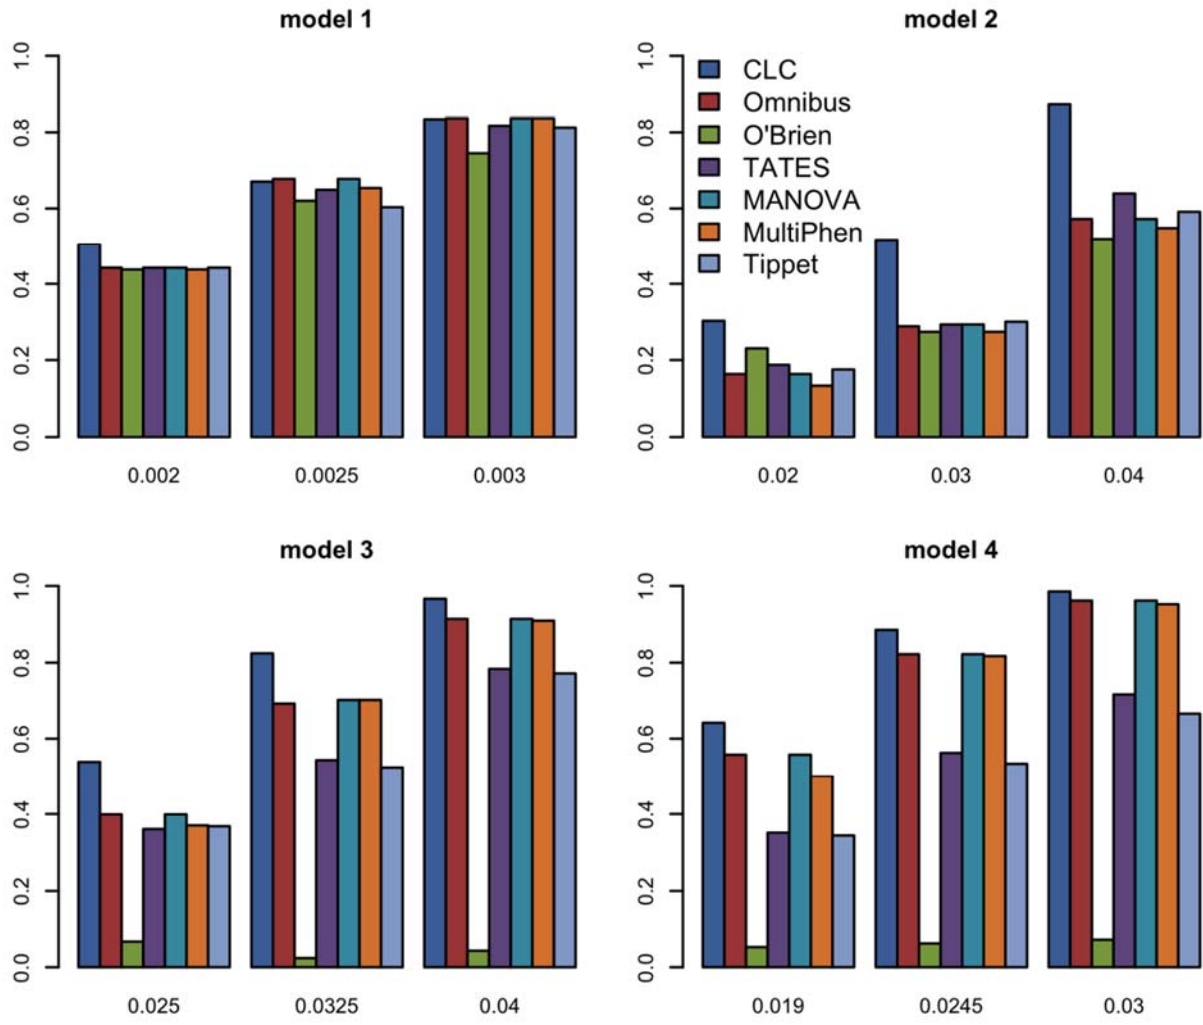

**Fig. S5.** Power comparisons of the seven tests (O'Brien, Omnibus, CLC, TATES, MANOVA, MultiPhen, and Tippet) for the power as a function of effect size  $\beta$  for 20 quantitative phenotypes. The sample size is 5000. The between-factor correlation is 0.15 and the within-factor correlation is 0.25.

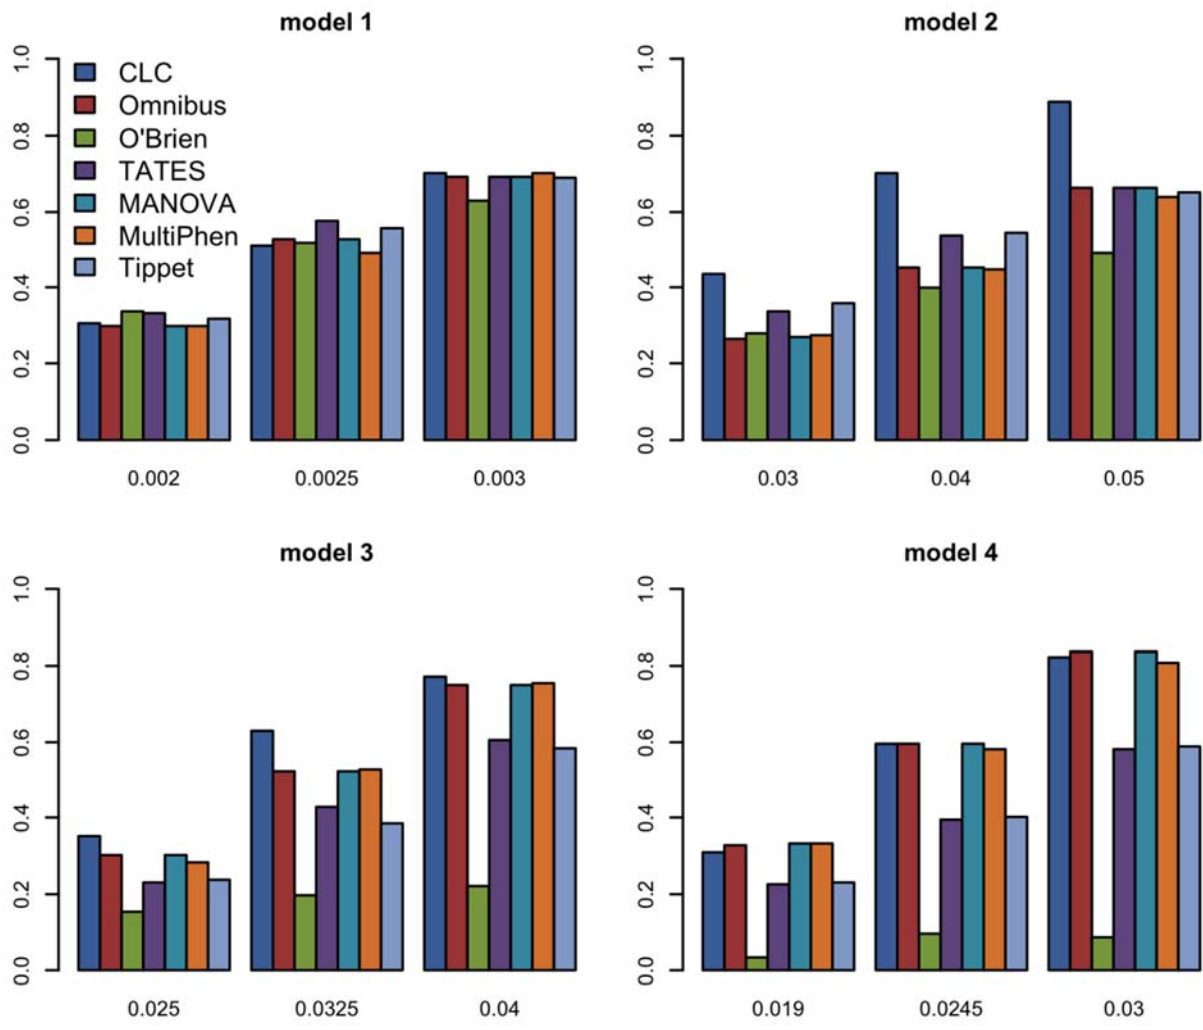

**Fig. S6.** Power comparisons of the seven tests (O'Brien, Omnibus, CLC, TATES, MANOVA, MultiPhen, and Tippet) for the power as a function of effect size  $\beta$  for 20 phenotypes with half quantitative phenotypes and half qualitative phenotypes. The sample size is 5000. The between-factor correlation is 0.15 and the within-factor correlation is 0.25.

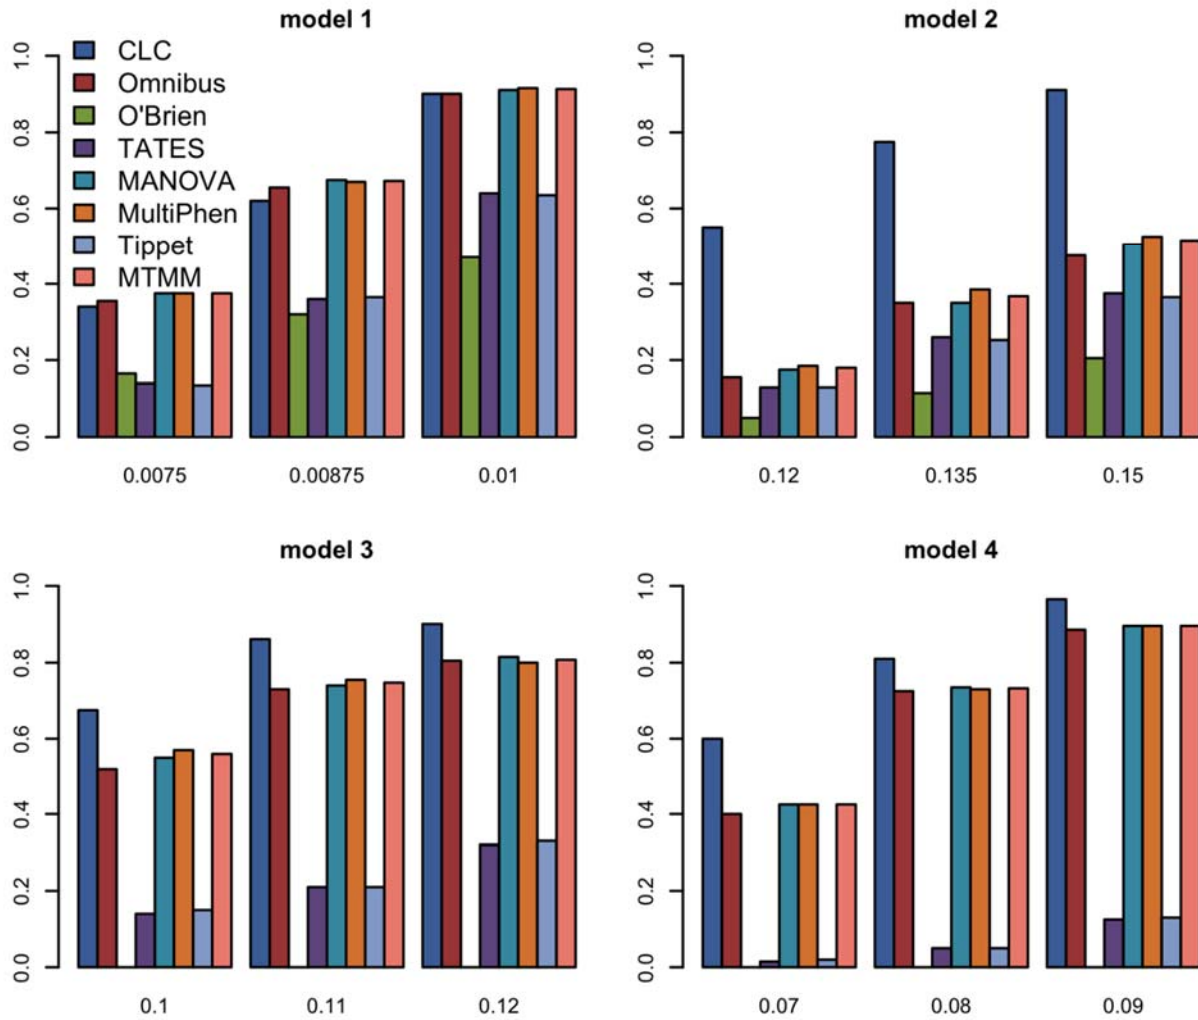

**Fig. S7.** Power comparisons of the eight tests (O'Brien, Omnibus, CLC, TATES, MANOVA, MultiPhen, Tippet, and MTMM) for the power as a function of effect size  $\beta$  for 20 quantitative phenotypes. The sample size is 1000. The between-factor correlation is 0.15 and the within-factor correlation is 0.25. The p-values of CLC are evaluated using  $10^6$  simulations; the p-values of Tippet are evaluated using  $10^6$  permutations; and the power is evaluated using 1,000 replicated samples at a significance level of  $10^{-4}$ .



**Fig. S8.** The correlation matrix plot of the seven COPD-related phenotypes.

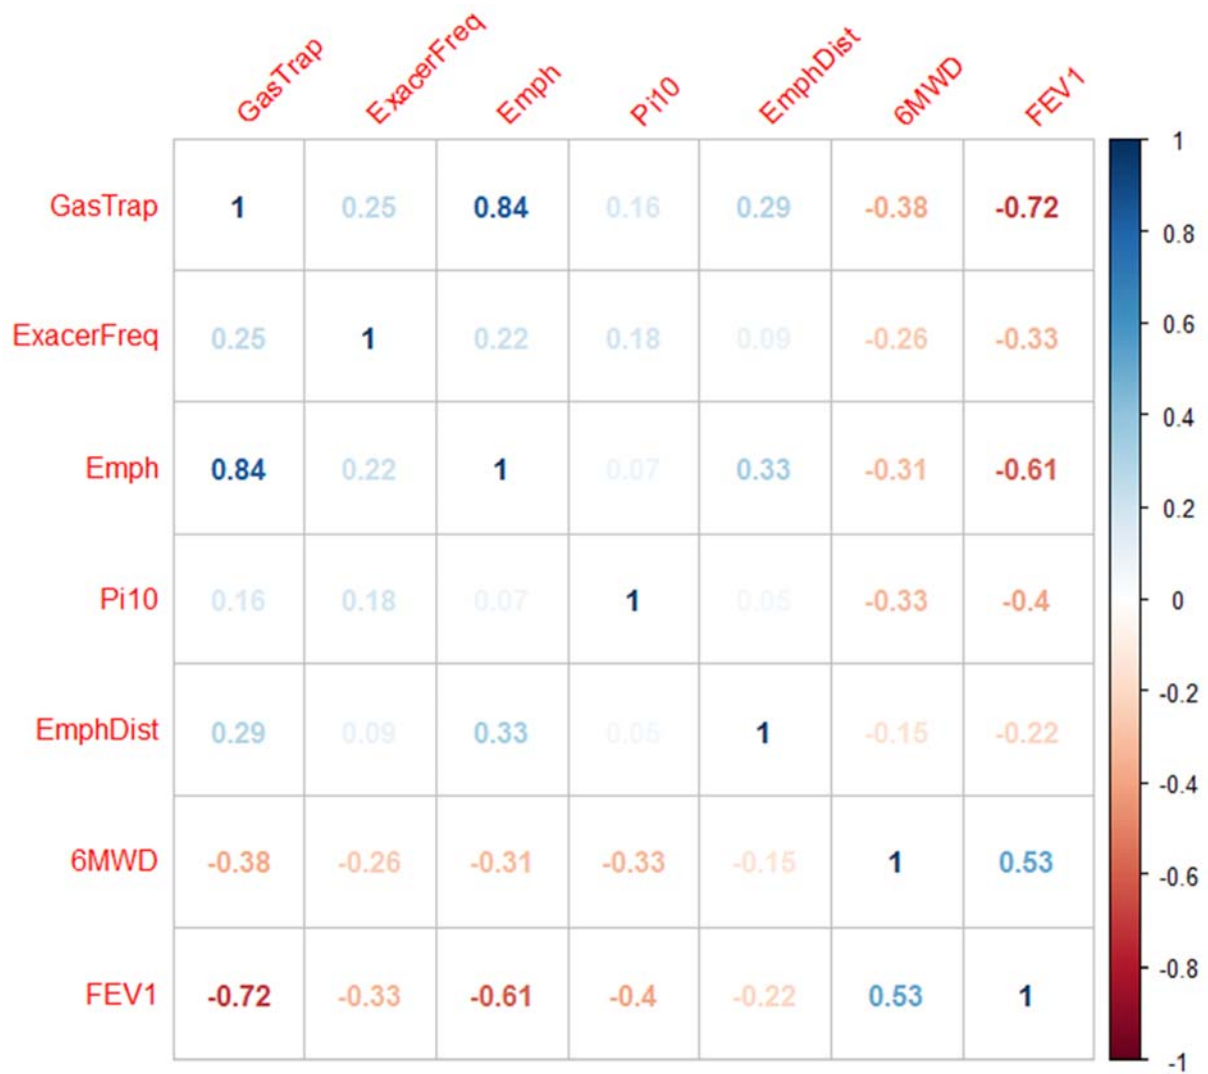

**Table S1.** The estimated type I error rates divided by the nominal significance level of O'Brien, Omnibus, TATES, MANOVA, and MultiPhen for 100 phenotypes and 1000 individuals under four models by using their analytic p-values. The type I error rates of significance level  $10^{-4}$  are evaluated by  $10^6$  replicates. The 95% CI for type I error rate divided by the nominal significance level  $10^{-4}$  for  $10^6$  replicates is (0.80,1.20).

|                                        | Model | OB   | OMI  | TATES | MANOVA | MultiPhen |
|----------------------------------------|-------|------|------|-------|--------|-----------|
| Quantitative                           | 1     | 0.92 | 0.81 | 0.92  | 0.86   | 1.60      |
|                                        | 2     | 0.89 | 0.83 | 0.99  | 0.90   | 1.51      |
|                                        | 3     | 0.98 | 0.92 | 0.90  | 1.12   | 1.46      |
|                                        | 4     | 0.92 | 0.84 | 1.04  | 1.01   | 1.59      |
| Half quantitative and half qualitative | 1     | 0.87 | 0.86 | 0.99  | 0.97   | 1.64      |
|                                        | 2     | 0.87 | 0.81 | 0.87  | 0.98   | 1.57      |
|                                        | 3     | 0.96 | 0.82 | 1.06  | 0.90   | 1.70      |
|                                        | 4     | 0.98 | 0.93 | 0.89  | 1.20   | 1.63      |

**Table S2.** Significant SNPs, the corresponding adjusted (Bonferroni correction for multiple testing) p-values for testing each of the seven phenotypes individually, and the minimum p-values over all phenotypes after adjustment for the number of phenotypes (Min-P) in the analysis of COPDGene.

| Chr | Position  | Variant identifier | Gas Trapping          | Exacerbation Frequency | Emphysema             | Airway Wall Area | Emphysema Distribution | Six-minute walk distance | FEV1                  | Min-P                  |
|-----|-----------|--------------------|-----------------------|------------------------|-----------------------|------------------|------------------------|--------------------------|-----------------------|------------------------|
| 4   | 145431497 | rs1512282          | $2.81 \times 10^{-4}$ | $6.06 \times 10^{-3}$  | $1.64 \times 10^{-4}$ | 5.92             | $6.74 \times 10^{-9}$  | $6.12 \times 10^{-3}$    | $4.53 \times 10^{-3}$ | $4.72 \times 10^{-8}$  |
| 4   | 145434744 | rs1032297          | $1.17 \times 10^{-5}$ | $7.33 \times 10^{-3}$  | $1.24 \times 10^{-5}$ | 5.26             | $7.64 \times 10^{-13}$ | $2.06 \times 10^{-3}$    | $2.99 \times 10^{-5}$ | $5.35 \times 10^{-12}$ |
| 4   | 145474473 | rs1489759          | $1.51 \times 10^{-5}$ | $3.40 \times 10^{-2}$  | $8.82 \times 10^{-6}$ | 5.32             | $1.20 \times 10^{-18}$ | $3.55 \times 10^{-4}$    | $3.96 \times 10^{-5}$ | $8.40 \times 10^{-18}$ |
| 4   | 145485738 | rs1980057          | $1.92 \times 10^{-5}$ | $2.82 \times 10^{-2}$  | $1.82 \times 10^{-5}$ | 4.93             | $1.40 \times 10^{-19}$ | $6.22 \times 10^{-4}$    | $7.18 \times 10^{-5}$ | $9.80 \times 10^{-19}$ |
| 4   | 145485915 | rs7655625          | $1.45 \times 10^{-5}$ | $2.92 \times 10^{-2}$  | $1.29 \times 10^{-5}$ | 4.94             | $2.40 \times 10^{-16}$ | $4.41 \times 10^{-4}$    | $4.13 \times 10^{-5}$ | $1.68 \times 10^{-15}$ |
| 15  | 78882925  | rs16969968         | $4.88 \times 10^{-4}$ | 3.09                   | $1.82 \times 10^{-7}$ | 5.13             | $3.13 \times 10^{-8}$  | 2.23                     | $4.03 \times 10^{-6}$ | $2.19 \times 10^{-7}$  |
| 15  | 78894339  | rs1051730          | $3.66 \times 10^{-4}$ | 3.28                   | $1.82 \times 10^{-7}$ | 4.92             | $2.77 \times 10^{-8}$  | 2.15                     | $3.54 \times 10^{-6}$ | $1.94 \times 10^{-7}$  |
| 15  | 78898723  | rs12914385         | $4.77 \times 10^{-5}$ | 1.76                   | $2.14 \times 10^{-7}$ | 1.91             | $5.32 \times 10^{-10}$ | $2.42 \times 10^{-1}$    | $1.49 \times 10^{-7}$ | $3.72 \times 10^{-9}$  |
| 15  | 78911181  | rs8040868          | $1.07 \times 10^{-4}$ | 1.02                   | $4.66 \times 10^{-7}$ | 2.55             | $2.43 \times 10^{-9}$  | $3.37 \times 10^{-1}$    | $8.23 \times 10^{-8}$ | $1.70 \times 10^{-8}$  |
| 15  | 78878541  | rs951266           | $5.86 \times 10^{-4}$ | 3.19                   | $1.67 \times 10^{-7}$ | 5.38             | $5.42 \times 10^{-8}$  | 2.77                     | $6.39 \times 10^{-6}$ | $3.79 \times 10^{-7}$  |
| 15  | 78806023  | rs8034191          | $2.45 \times 10^{-3}$ | 3.06                   | $1.61 \times 10^{-6}$ | 4.40             | $1.03 \times 10^{-7}$  | 3.21                     | $2.80 \times 10^{-5}$ | $7.21 \times 10^{-7}$  |
| 15  | 78851615  | rs2036527          | $3.35 \times 10^{-3}$ | 3.49                   | $3.00 \times 10^{-6}$ | 4.45             | $1.64 \times 10^{-7}$  | 2.14                     | $2.09 \times 10^{-5}$ | $1.15 \times 10^{-6}$  |
| 15  | 78826180  | rs931794           | $1.39 \times 10^{-2}$ | 3.70                   | $4.84 \times 10^{-6}$ | 3.76             | $1.23 \times 10^{-7}$  | 2.38                     | $5.94 \times 10^{-5}$ | $8.61 \times 10^{-7}$  |
| 15  | 78740964  | rs2568494          | $3.40 \times 10^{-2}$ | 6.46                   | $3.08 \times 10^{-5}$ | 6.79             | $2.01 \times 10^{-4}$  | 1.67                     | $1.97 \times 10^{-4}$ | $2.16 \times 10^{-4}$  |
